# Supplementary material for: Strong metal–support interaction in copper hexacyanoferrate nanocube decorated functionalized multiwall carbon nanotubes for enhanced bi-functional oxygen electrocatalytic activity and stability
Source: Royal Society of Chemistry journal article supplement (doi:10.1039/d1se01635k), 2021-12-28
Supplement: d1se01635k1.pdf [file d1se01635k1.pdf]

Electronic Supporting Information

**Strong Metal-Support Interaction in Copper Hexacyanoferrate Nanocubes Decorated  
Functionalized Multiwall Carbon Nanotubes for Enhanced Bi-functional Oxygen  
Electrocatalytic Activity and Stability**

Priya Jain, Shwetambara Jha and Pravin P. Ingole\*

*Department of Chemistry, Indian Institute of Technology Delhi, New Delhi– 110016, India*

**Table S1:** Comparison of ORR performance of Prussian blue based materials.

| S.No.     | Catalyst         | Synthesis procedure                        | Electrolyte                                                                 | E <sub>onset</sub> (V) | E <sub>1/2</sub> (V) | J <sub>1600 rpm</sub> (mA cm <sup>-2</sup> ) | N              | Ref.              |
|-----------|------------------|--------------------------------------------|-----------------------------------------------------------------------------|------------------------|----------------------|----------------------------------------------|----------------|-------------------|
| 1.        | CoFe-NC/NC       | Pyrolysis of CoFePBA                       | 0.1 M KOH                                                                   | 0.96V                  | 0.85 V vs RHE        | -                                            | 3.94-3.99      | 1                 |
| 2.        | Ni-HCF thin film | Chemical anodising                         | 0.1 M KOH                                                                   | 0.685 V vs RHE         | -                    | 2.25                                         | 2-2.25         | 2                 |
| 3.        | PBC/C            | Solid state pyrolysis of Fe-EDTA           | 0.1 M KOH                                                                   | 0.89 V vs RHE          | -                    | 6.4                                          | 3.8            | 3                 |
| 4.        | Cu/Fe/N-C        | Pyrolysis of CuHCF and melamine precursors | 50 mM PBS solution                                                          | 0.12V (vs Ag/Ag Cl)    | 0.0 V vs Ag/Ag Cl    | 6.04                                         | -              | 4                 |
| 5.        | PB/GE            | Spontaneous redox synthesis                | 0.1 M H <sub>2</sub> SO <sub>4</sub> + 0.1 M K <sub>2</sub> SO <sub>4</sub> | -0.2V vs SCE           | -                    | -                                            | 4              | 5                 |
| 6.        | CdHCF            | Anion exchange route                       | 0.1 M KOH                                                                   | 0.84V vs RHE           | -                    | -                                            | 2.37           | 6                 |
| 7.        | rGO-Pb/Pt        | Sol gel aggregation                        | 0.5 M H <sub>2</sub> SO <sub>4</sub>                                        | -                      | -                    | -                                            | 3.9-3.95       | 7                 |
| <b>8.</b> | <b>CHF/f-CNT</b> | <b>Hydrothermal synthesis</b>              | <b>0.1 M KOH</b>                                                            | <b>0.79V vs RHE</b>    | <b>0.63V vs RHE</b>  | <b>4</b>                                     | <b>3.6-3.8</b> | <b>This study</b> |

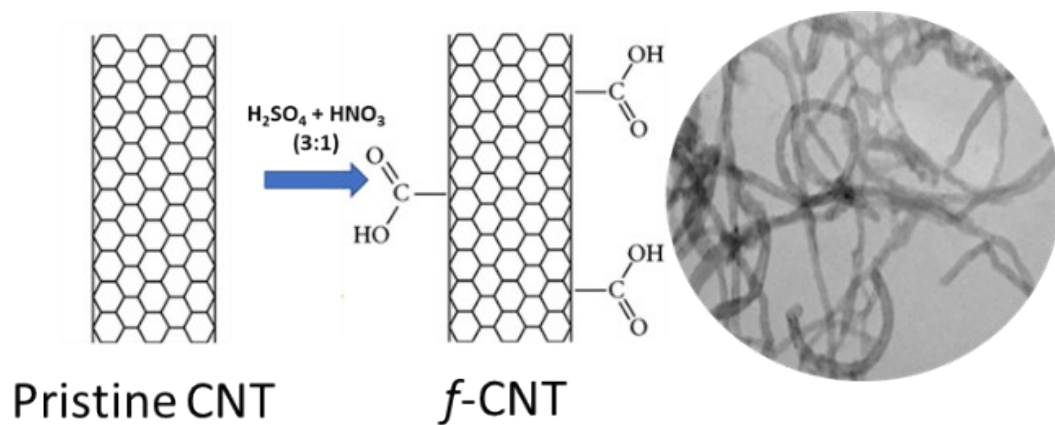

**Scheme S1:** A schematic representation of the functionalization of multi-walled carbon nanotubes.

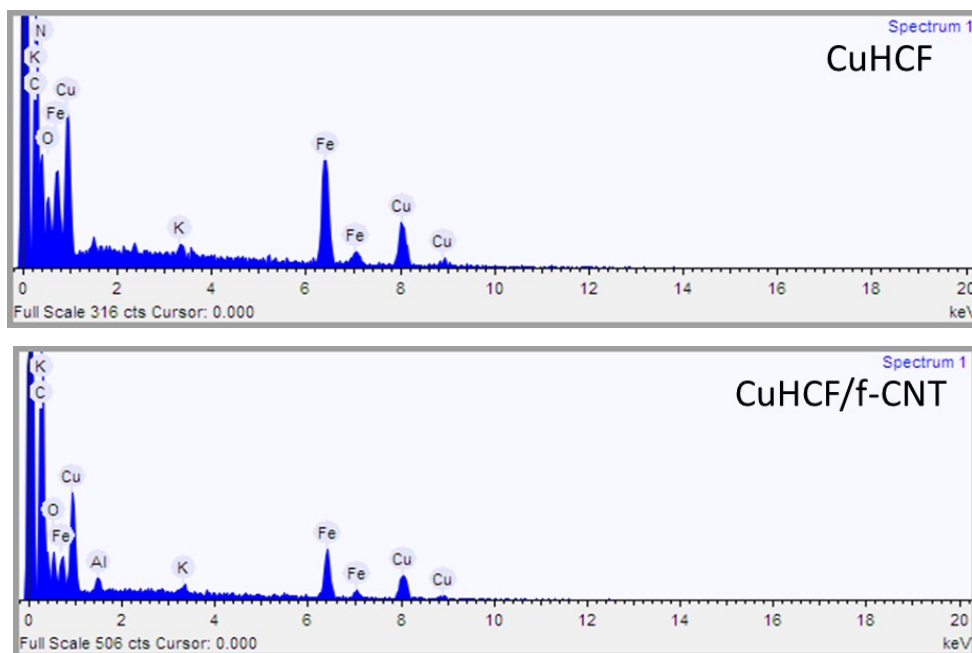

**Fig. S1:** The EDX spectra of CuHCF and CuHCF/f-CNT

**Table S2:** Chemical composition of MWCNTs samples in atomic %.

| Element   | CuHCF  | CuHCF/f-CNT |
|-----------|--------|-------------|
| Carbon    | 51.194 | 44.323      |
| Nitrogen  | 29.845 | 34.724      |
| Oxygen    | 13.335 | 13.507      |
| Potassium | 0.179  | 0.057       |
| Iron      | 2.295  | 3.573       |
| Copper    | 3.152  | 3.835       |

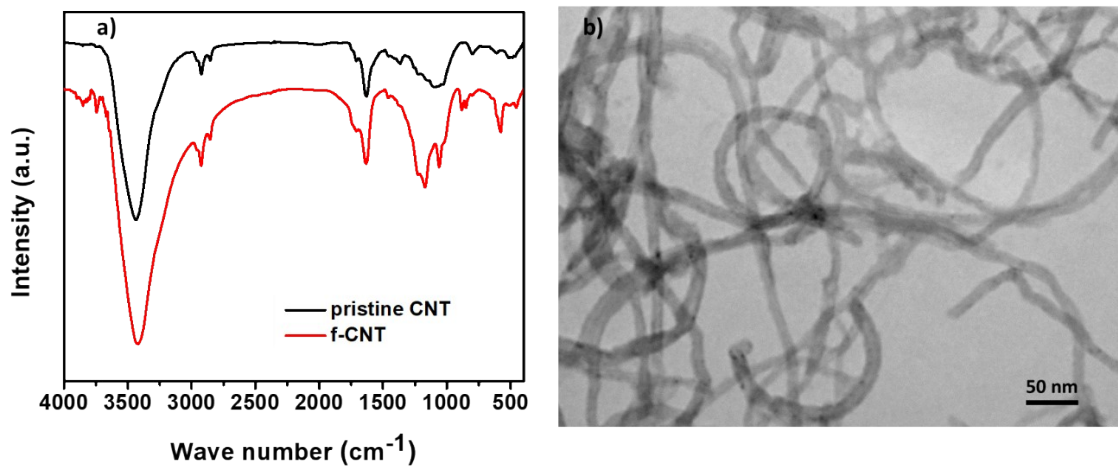

Fig. S2 a) FTIR of pristine MWCNT and *f*-MWCNT and b) TEM image of *f*-MWCNT.

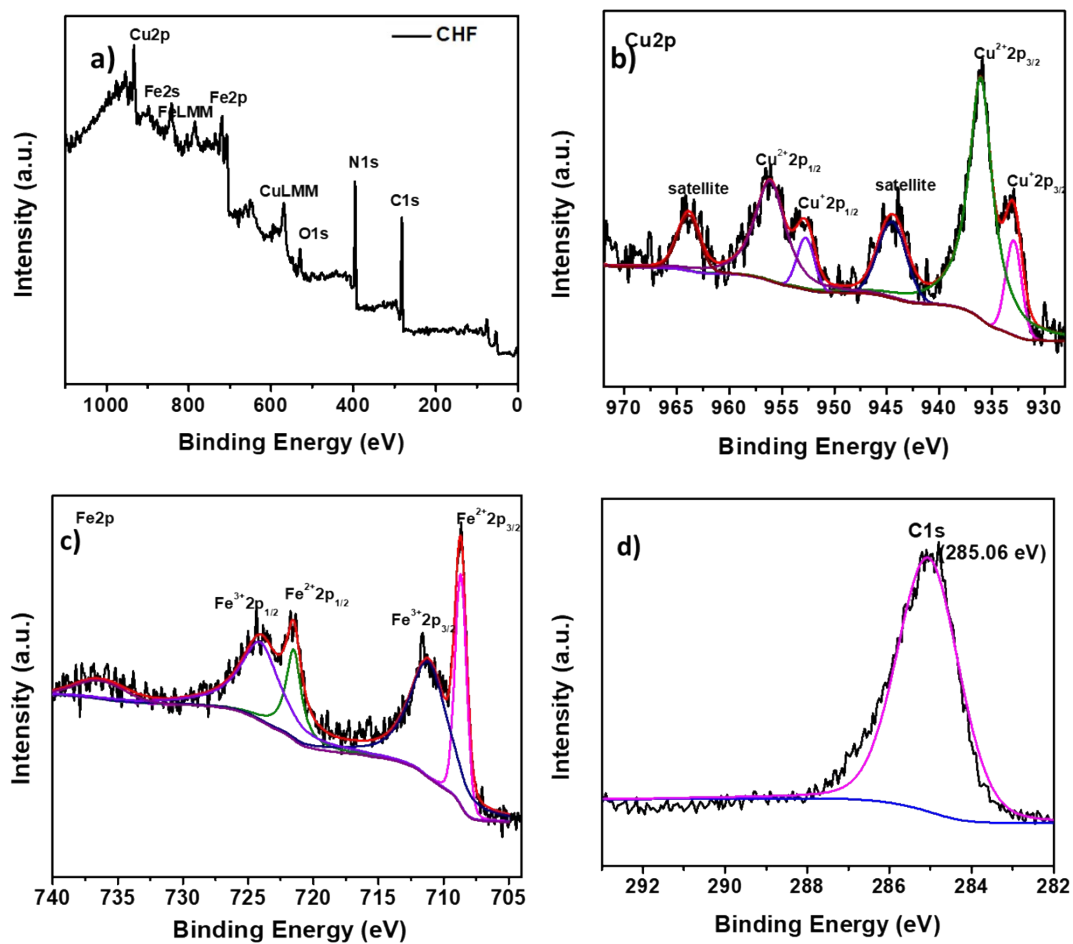

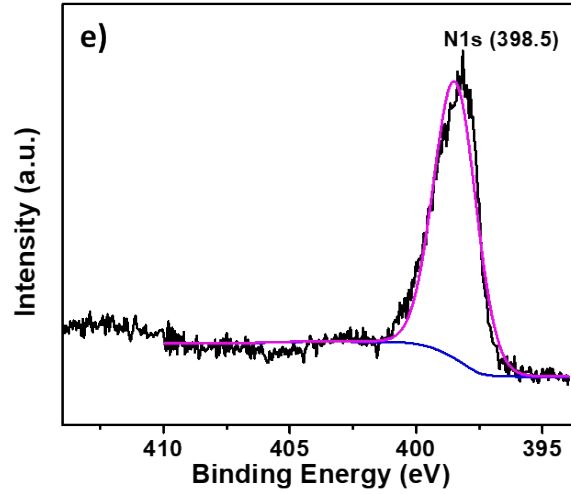

**Fig. S3:** XPS analysis of CuHCF, a) The survey spectrum and high resolution spectra of b) Cu2p, c) Fe2p, d) C1s and e) N1s.

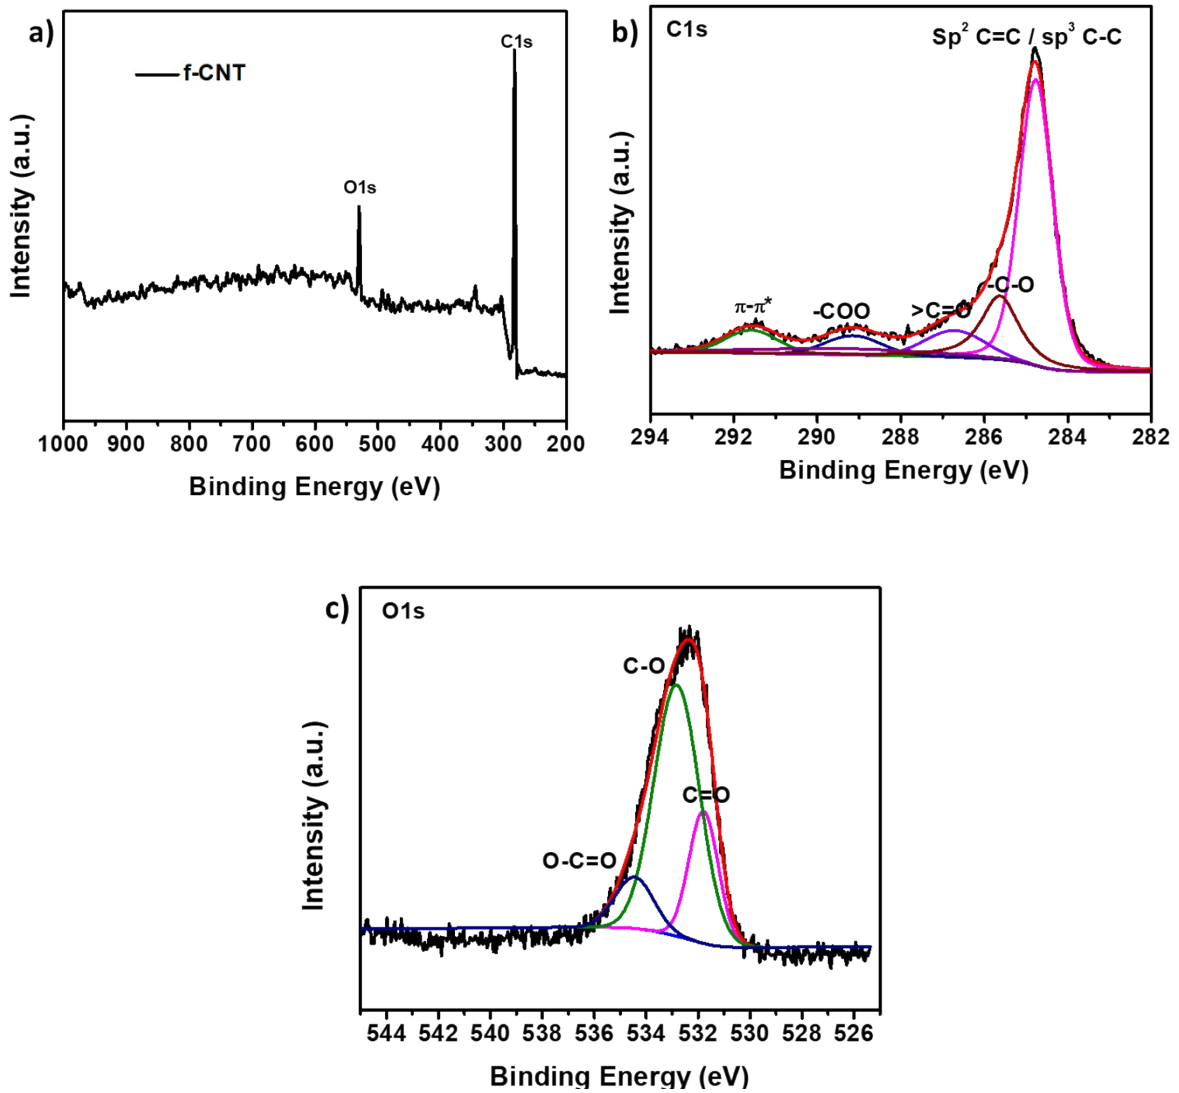

**Fig. S4:** XPS analysis of *f*-MWCNT, a) survey spectrum, the high resolution spectra of b) C1s and c) O1s.



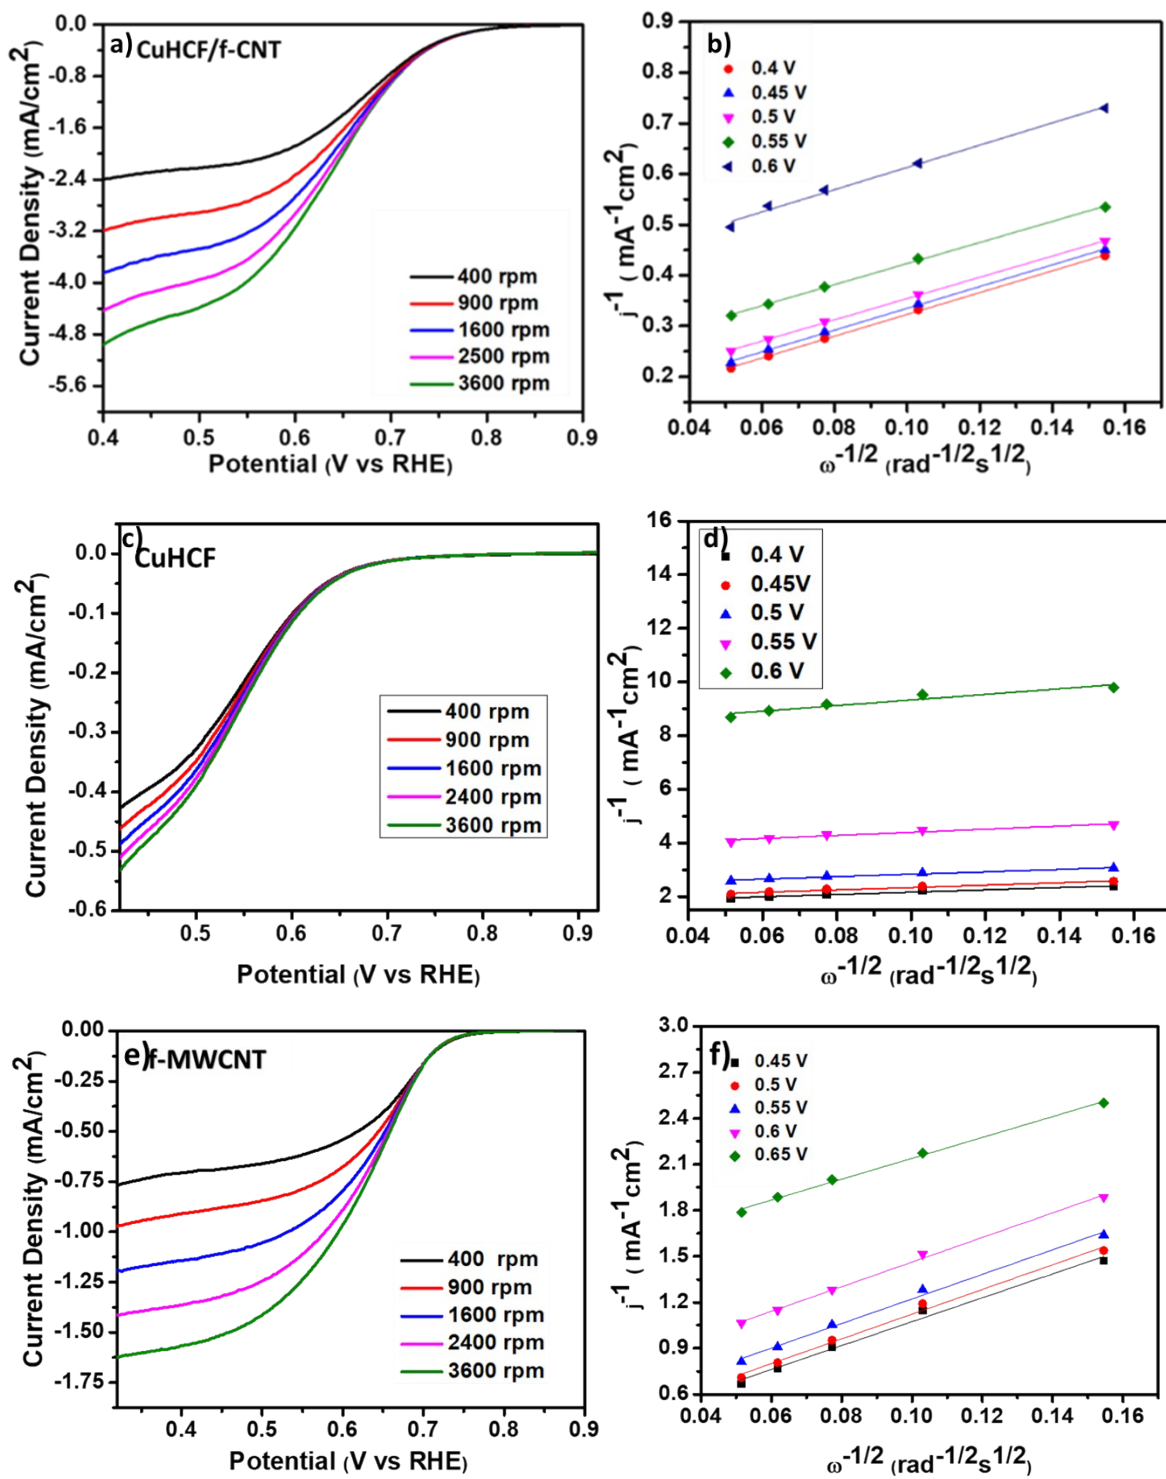

Fig. S5: RDE polarisation curve and corresponding K-L plots of a) and b) CuHCF/*f*-CNT, c) and d) CuHCF, and e) and f) *f*-MWCNT.

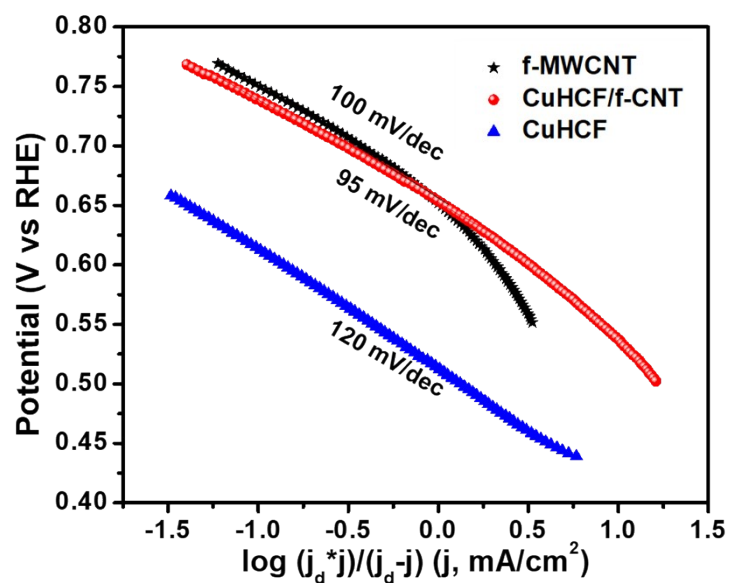

**Fig. S6:** Comparison of mass-transfer corrected Tafel slope of CuHCF, *f*-MWCNT and CuHCF/*f*-CNT.

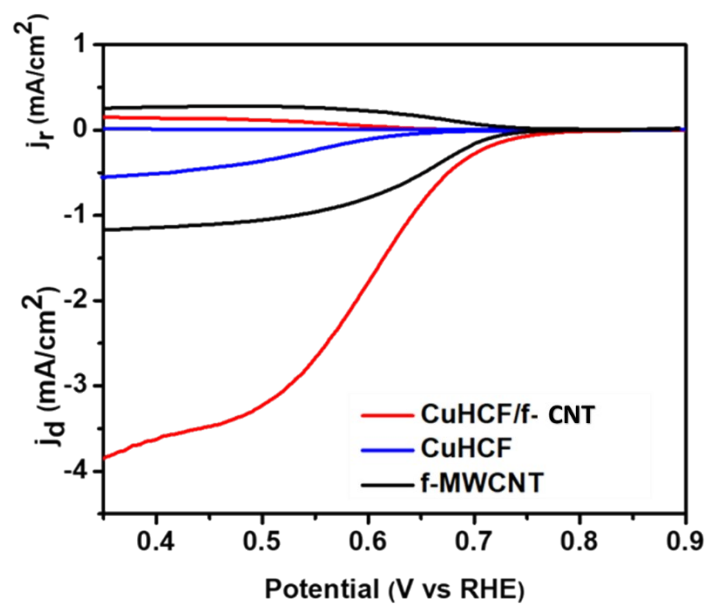

**Fig. S7:** RRDE comparison plot at 1600 rpm for CuHCF, *f*-MWCNT, and CuHCF/*f*-CNT.

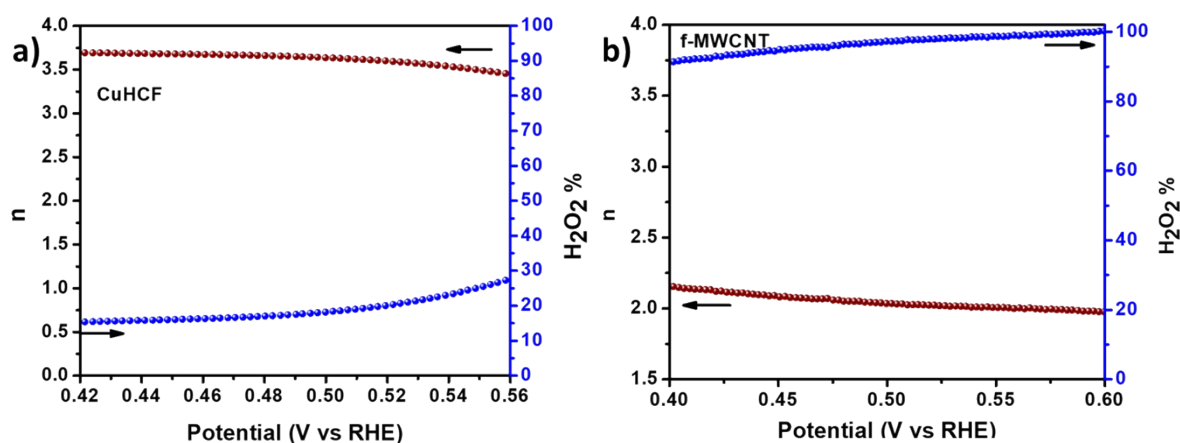

**Fig. S8:** The value of  $n$  and %  $\text{H}_2\text{O}_2$  for a) CuHCF and b) *f*-MWCNT.

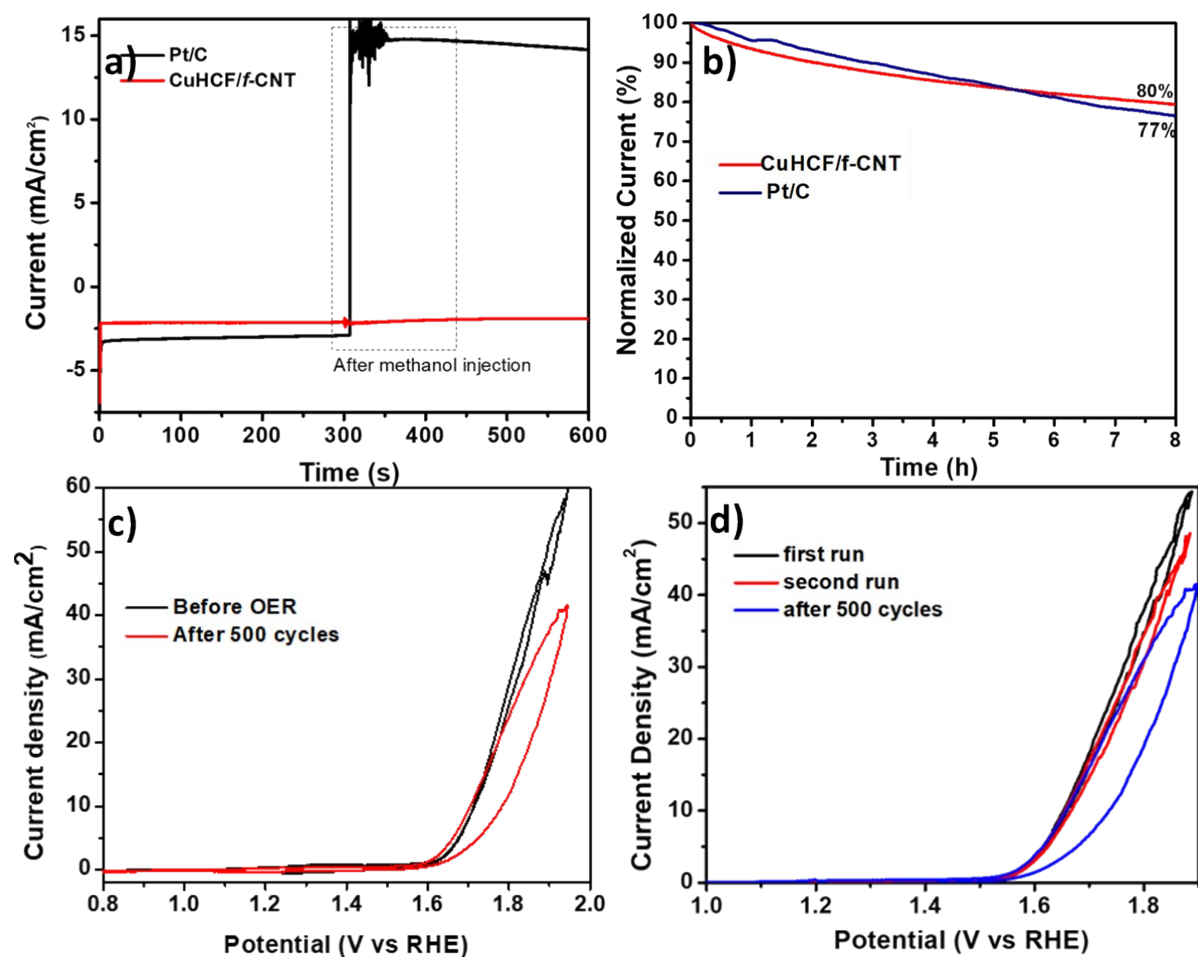

**Fig. S9:** **a)** The Chronoamperograms at 0.6 V vs RHE for CuHCF/*f*-CNT (red curve) and Pt/C (black curve) with addition of methanol at 300 s, **b)** The chronoamperograms at 0.6 V vs RHE for stability comparison for 8 hours for CuHCF/*f*-CNT and Pt/C (80 wt%), **c)** and **d)** The Cyclic voltammetry plot of CuHCF/*f*-CNT in 0.1M KOH solution before and after 500 CV cycles for OER stability.



**Table S3:** The comparison of ORR/OER electrocatalytic activity parameters for CuHCF, *f*-MWCNT and CuHCF/*f*-CNT.

|     | Material                                 | CuHCF                 | <i>f</i> -MWCNT       | CuHCF/ <i>f</i> -CNT  |
|-----|------------------------------------------|-----------------------|-----------------------|-----------------------|
| ORR | $E_{\text{onset}}$ (V vs RHE)            | 0.68                  | 0.78                  | 0.79                  |
|     | $E_{1/2}$ (V vs RHE)                     | 0.52                  | 0.65                  | 0.62                  |
|     | $n$ (0.5 V)                              | 3.63                  | 1.93                  | 3.78                  |
|     | % $\text{H}_2\text{O}_2$ (0.5 V)         | 18                    | 99                    | 15                    |
|     | $J_k$ (0.6V) ( $\text{mA}/\text{cm}^2$ ) | 0.12                  | 0.68                  | 2.56                  |
|     | $J_d$ ( $\text{mA}/\text{cm}^2$ ) (0.4V) | 0.5                   | 1.16                  | 3.4                   |
|     | Tafel slope ( $\text{mV}/\text{dec}$ )   | 120                   | 100                   | 95                    |
|     | $\alpha$                                 | 0.49                  | 0.59                  | 0.62                  |
|     | $J_0$ ( $\text{mA}/\text{cm}^2$ )        | $4.67 \times 10^{-4}$ | $1.83 \times 10^{-3}$ | $7.94 \times 10^{-3}$ |
|     | $K^0$ ( $\text{cm}/\text{s}$ )           | $4.84 \times 10^{-5}$ | $1.89 \times 10^{-4}$ | $8.22 \times 10^{-4}$ |
| OER | $E_{\text{onset}}$ (V vs RHE)            | 1.75                  | 1.65                  | 1.60                  |
|     | Tafel slope ( $\text{mV}/\text{dec}$ )   | 165                   | 105                   | 86                    |

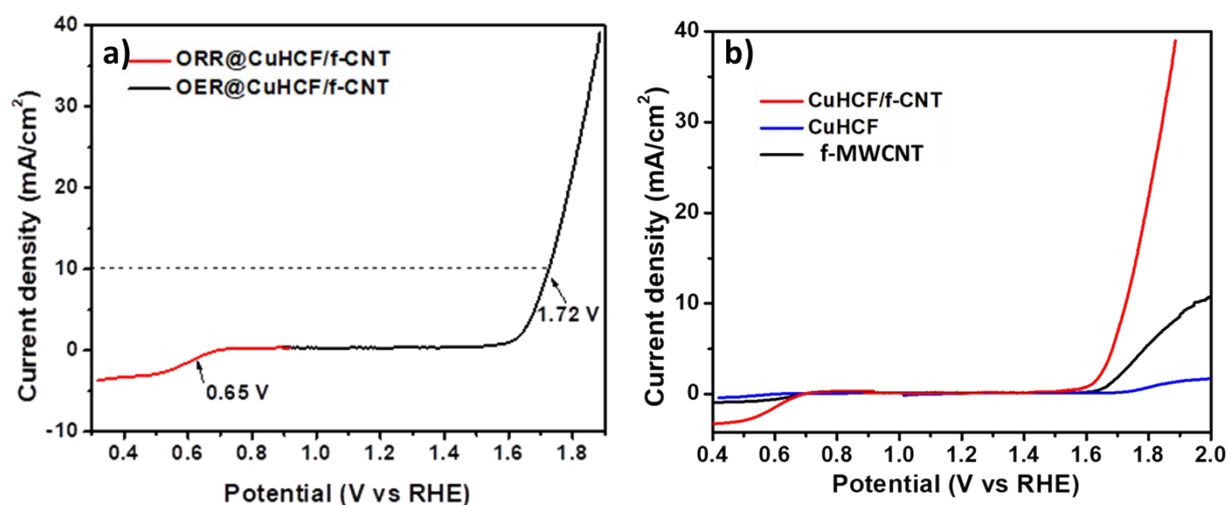

**Fig. S10:** a) The plot of ORR ( $E_{1/2}$ ) and OER ( $10 \text{ mA}/\text{cm}^2$ ), with  $\Delta E = 1.07 \text{ V}$  vs RHE, b) Comparison plot for bifunctional OER/ORR activity for CuHCF, CuHCF/*f*-CNT and *f*-MWCNTs.

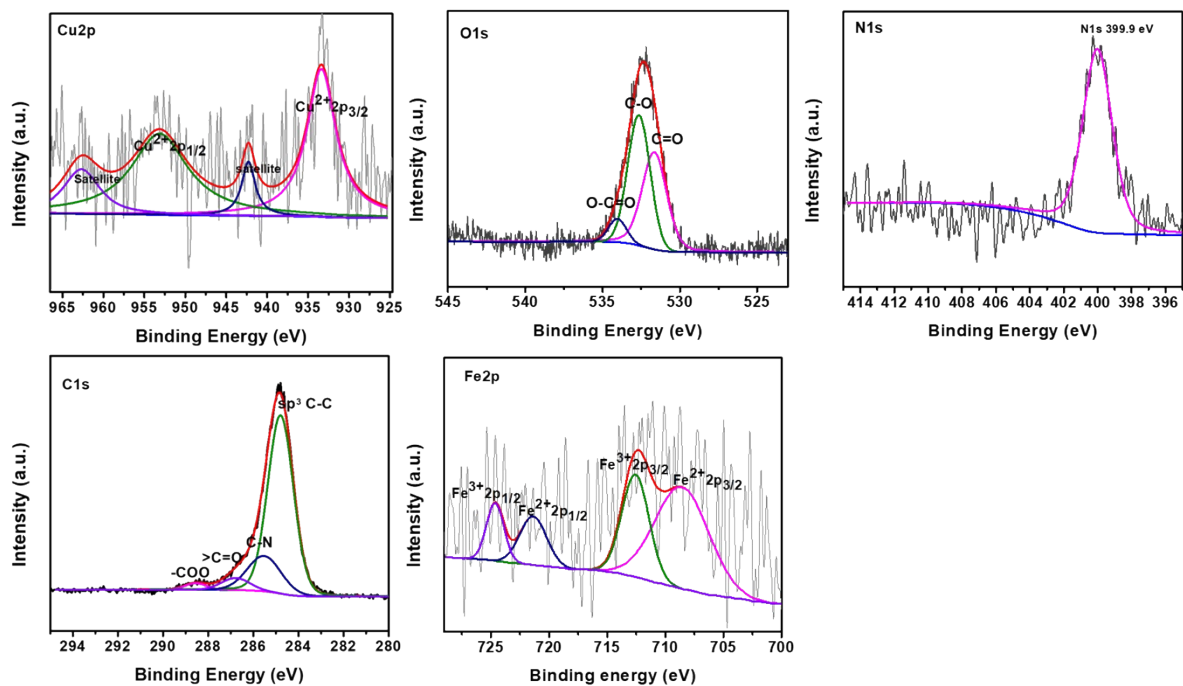

**Fig. S11:** XPS analysis of CuHCF/*f*-CNT after ORR analysis.

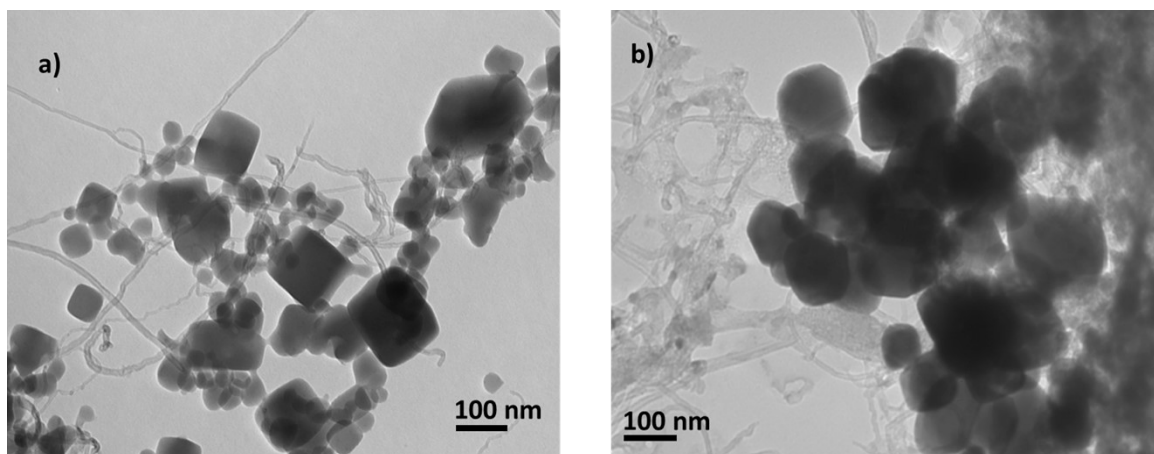

**Fig. S12:** TEM images of CuHCF/*f*-CNT before analysis (a) and after analysis (b)

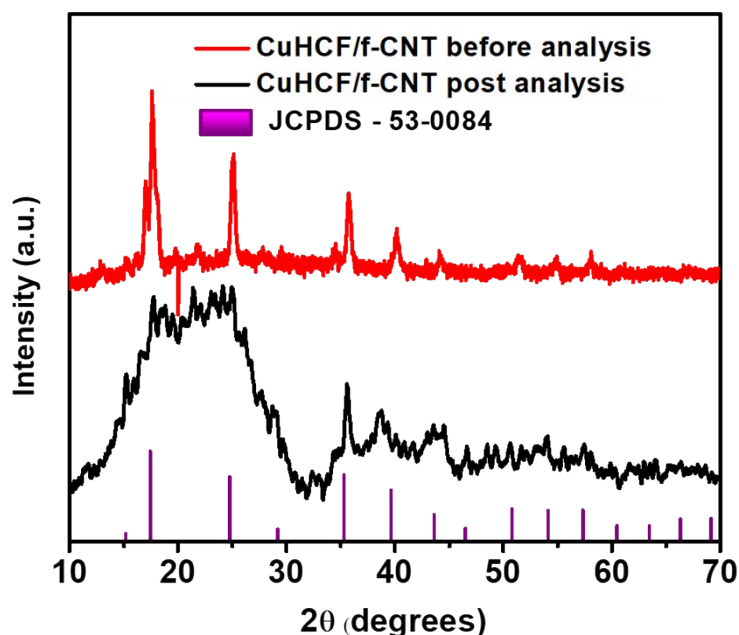

**Fig. S13:** XRD pattern before and after ORR analysis of CuHCF/f-CNT

#### Synthesis of Copper Hydroxide loaded MWCNTs:

For a comparison, the  $\text{Cu}(\text{OH})_2/\text{CNT}$  composite was prepared using a simple reported co-precipitation strategy. In a typical procedure, 10 mg of f-MWCNTs were dissolved in 30 mL distilled water and was dispersed using ultrasonicator. To the dispersion, 40 mM of  $\text{Cu}(\text{NO}_3)_2 \cdot 3\text{H}_2\text{O}$  was added followed by 15 mL of 0.3 M ammonia solution under constant magnetic stirring. A blue precipitate was produced by adding dropwise 50 mL, 1 M NaOH solution. The resulting precipitate was filtered and washed with distilled water and dried at room temperature overnight.<sup>8</sup>

While following the same procedure used for the synthesis of CuHCF/f-CNT, but without the addition of iron precursor, i.e.,  $\text{K}_3[\text{Fe}(\text{CN})_6]$ , that resulted into  $\text{CuO}/\text{f-CNT}$  was also synthesized for comparison. In detailed procedure, 10 mg of f-MWCNT was dispersed in 30 mL distilled water followed by addition of  $\text{Cu}(\text{NO}_3)_2$  (40 mM) and then treated hydrothermally at 120 °C for 10 hours to obtain the precipitate. The resulted product was washed and dried before using it for electrochemical measurements.

**XRD Analysis:** The PXRD diffraction peaks of as synthesized  $\text{Cu}(\text{OH})_2/\text{CNT}$  is shown in Fig. S17 (a). From the PXRD pattern it can be observed that the peaks matches with the standard XRD pattern of orthorhombic  $\text{Cu}(\text{OH})_2$  (PDF – 35-0505) showing sharp, high crystalline peaks without any impurity peaks. The main peaks at  $2\theta$ , 16.7°, 23.8°, 34.1°, 35.9°, 39.7°, 53.3°, and

63.0°, corresponds to the orthorhombic planes as assigned in the Fig. S17 (a).<sup>8</sup> In the PXRD pattern of as prepared CuO/f-CNT (Fig. S17 c), the XRD pattern matches with the standard CuO (PDF -892531).

**FTIR Analysis:** The FTIR spectrum of Cu(OH)<sub>2</sub>/CNT is shown in Fig. S17b), the peak at 3313 and 3568 cm<sup>-1</sup> is assigned to the OH<sup>-</sup> ions, the broad band at 3426 cm<sup>-1</sup> and a peak at 1640 cm<sup>-1</sup> is attributed to the OH stretching and bending modes in H<sub>2</sub>O, respectively. The C-H vibration is evident from the peak at 1383 cm<sup>-1</sup>. The absorption peak at 689.5 cm<sup>-1</sup> is for Cu-O vibrations.<sup>9</sup>

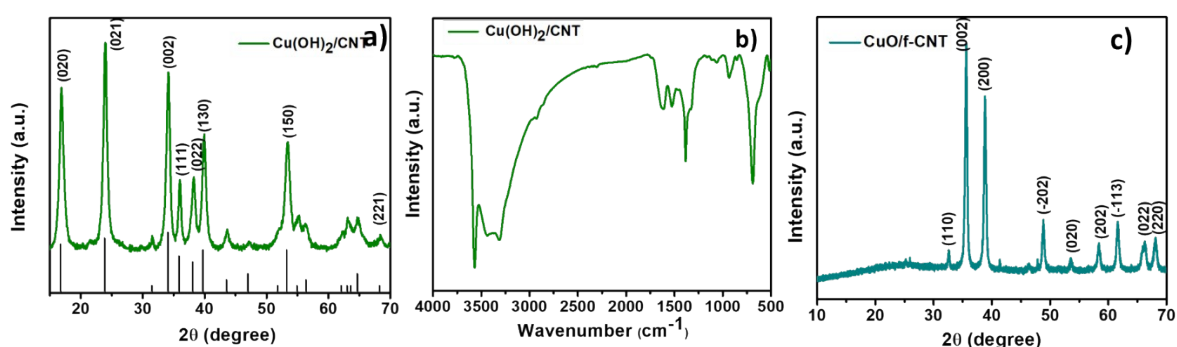

**Fig. S14:** a) PXRD pattern of Cu(OH)<sub>2</sub>/CNT and standard XRD pattern of Cu(OH)<sub>2</sub> (PDF – 35-0505) b) FTIR spectra for as synthesized Cu(OH)<sub>2</sub>/CNT, c) PXRD pattern of CuO/f-CNT.

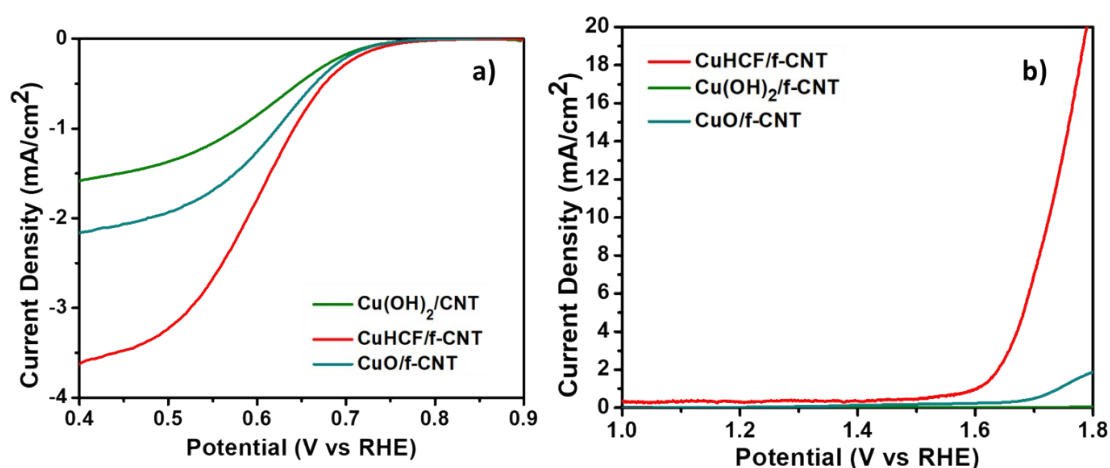

**Fig. S15:** The comparison of LSV polarisation curves for the a) ORR activity and b) OER activity of CuHCF/f-CNT and Cu(OH)<sub>2</sub>/CNT.

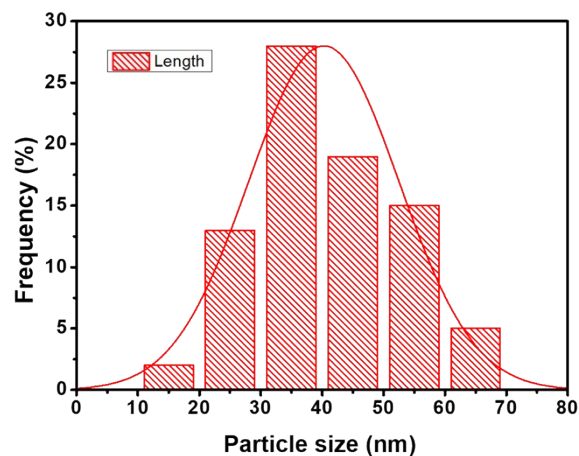

**Fig. S16:** Particle size distribution corresponding to TEM image in **Fig 3** for CuHCF/f-CNT.

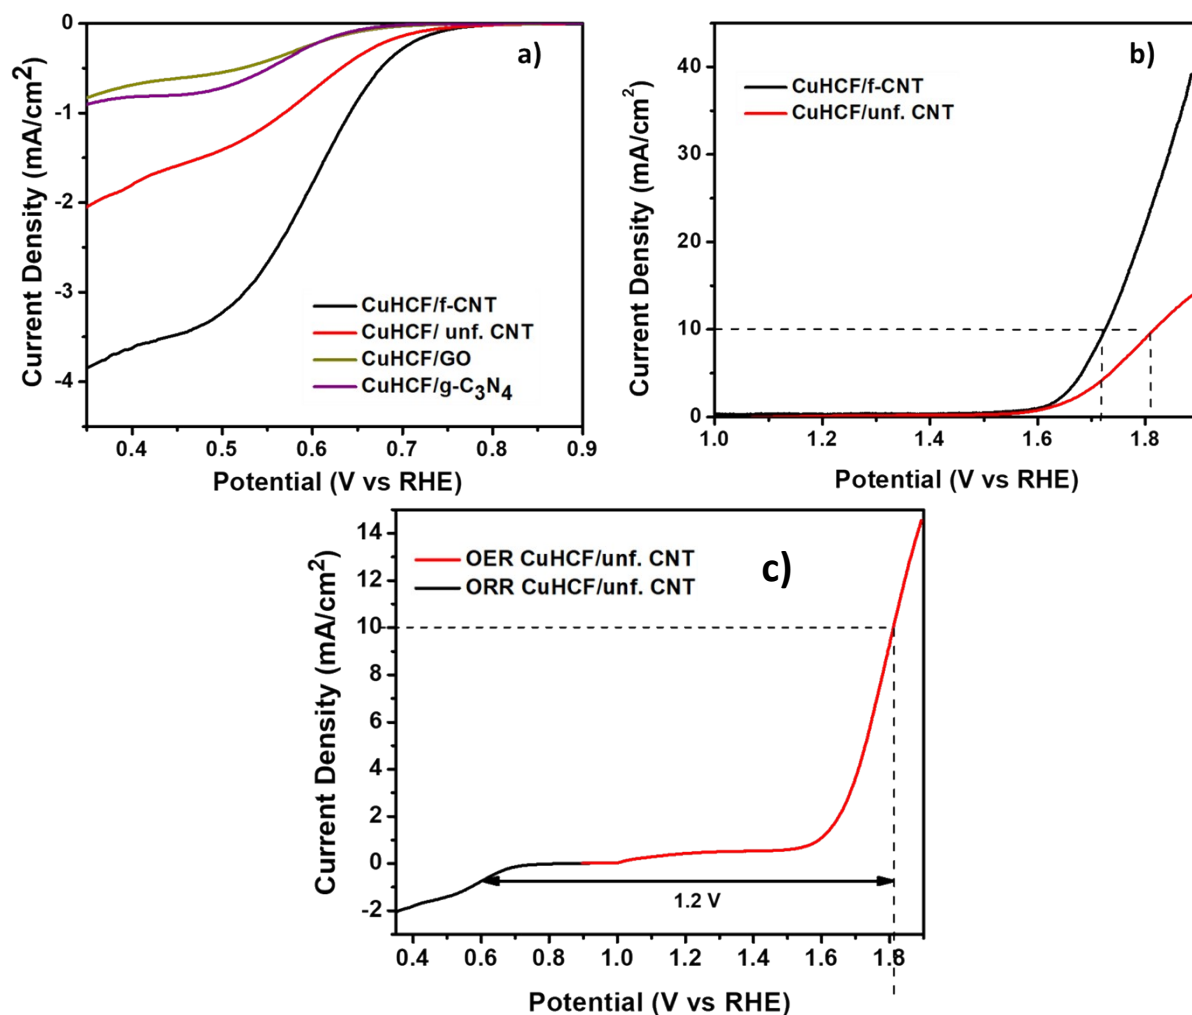

**Fig. S17:** The comparison plots for CuHCF/f-CNT and

CuHCF/unf. CNT. a) LSV polarisation curve in O<sub>2</sub> saturated 0.1 M KOH for ORR activity, b) LSV curve comparison in 0.1 M KOH for OER activity, c) Bifunctional activity of CuHCF/unf. CNT in terms of  $\Delta E$ .

## References

- 1 T. Najam, M. Wang, M. S. Javed, S. Ibraheem, Z. Song, M. M. Ahmed, A. ur Rehman, X. Cai and S. S. A. Shah, *J. Colloid Interface Sci.*, 2020, **578**, 89–95.
- 2 H. T. Bui, N. K. Shrestha, K. Cho, C. Bathula, H. Opoku, Y. Y. Noh and S. H. Han, *J. Electroanal. Chem.*, 2018, **828**, 80–85.
- 3 J. Sanetuntikul and S. Shanmugam, *Electrochim. Acta*, 2014, **119**, 92–98.
- 4 H. Wang, L. Wei, B. Duan, J. Liu and J. Shen, *J. Electroanal. Chem.*, 2020, **877**, 114556.
- 5 L. Xu, G. Zhang, J. Chen, Y. Zhou, G. Yuan and F. Yang, *J. Power Sources*, 2013, **240**, 101–108.
- 6 N. K. Shrestha, H. T. Bui, S. J. Yoon, S. A. Patil, C. Bathula, K. Lee, Y. Y. Noh and S. H. Han, *J. Electroanal. Chem.*, 2019, **847**, 113179.
- 7 B. Zakrzewska, B. Dembinska, S. Zoladek, I. A. Rutkowska, J. Żak, L. Stobinski, A. Małolepszy, E. Negro, V. Di Noto, P. J. Kulesza and K. Miecznikowski, *J. Electroanal. Chem.*, , DOI:10.1016/j.jelechem.2020.114347.
- 8 S. Cui, X. Liu, Z. Sun and P. Du, *ACS Sustain. Chem. Eng.*, 2016, **4**, 2593–2600.
- 9 S. H. Park and H. J. Kim, *J. Am. Chem. Soc.*, 2004, **126**, 14368–14369.
